# Supplementary material
Source: Springer Nature journal article supplement (https://www.springermedizin.de/resource/supplementary/13045_2014_400_MOESM8_ESM.pdf/9661292)

**A** LSK Promyelocytes Myelocytes Granulocytes

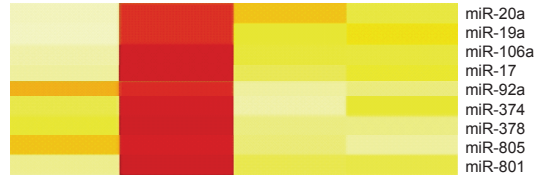

**B** LSK Promyelocytes Myelocytes Granulocytes

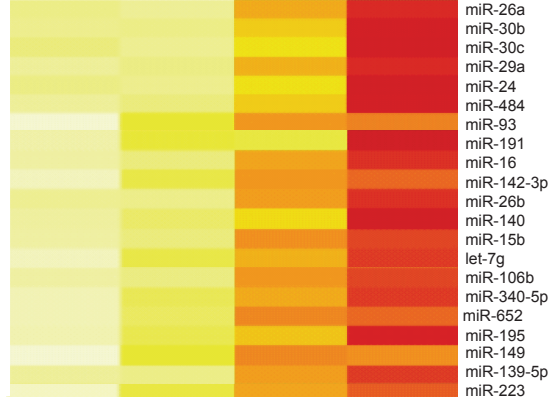

**C** LSK Promyelocytes Myelocytes Granulocytes

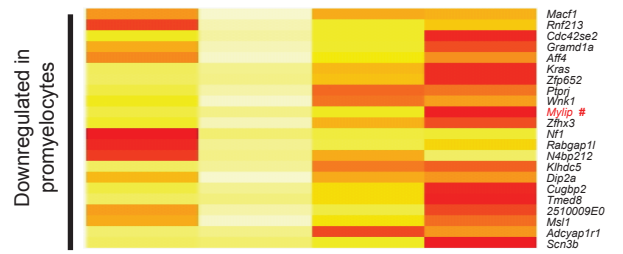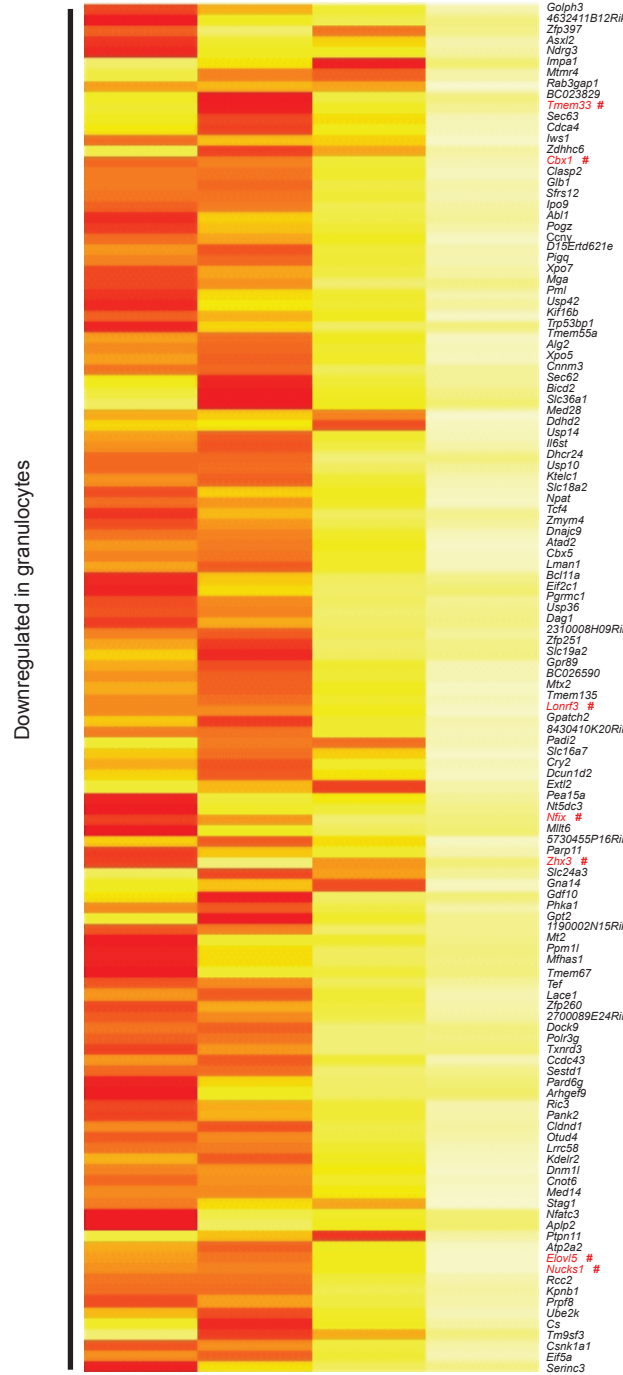

Supplement: MOESM8 [file 9661292]
